# Supplementary material
Source: PubMed Central journal article supplement (PMC8034562)
Supplement: NIHMS1669209-supplement-1.pdf [file NIHMS1669209-supplement-1.pdf]

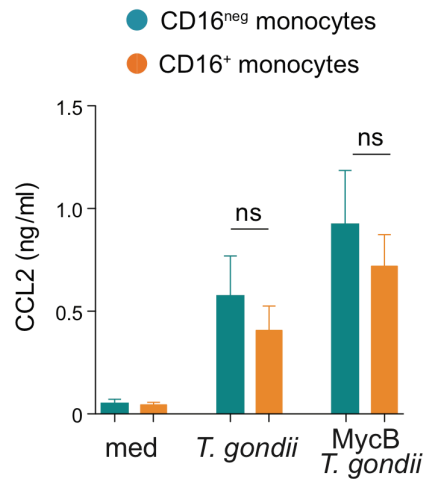

**Supplemental Figure 1: Both CD16<sup>neg</sup> and CD16<sup>+</sup> human monocytes secrete CCL2 in response to stimulation with *T. gondii* tachyzoites**

MACS-purified CD16<sup>neg</sup> and CD16<sup>+</sup> monocyte populations from healthy donors were cultured in medium alone or in the presence of untreated or mycalolide B (MycB) pre-treated *T. gondii* tachyzoites (MOI 1:1). After 18 hours incubation culture supernatants were collected and CCL2 was measured by ELISA. Bars represent the mean  $\pm$  SEM of values obtained for individual donors (n=6).

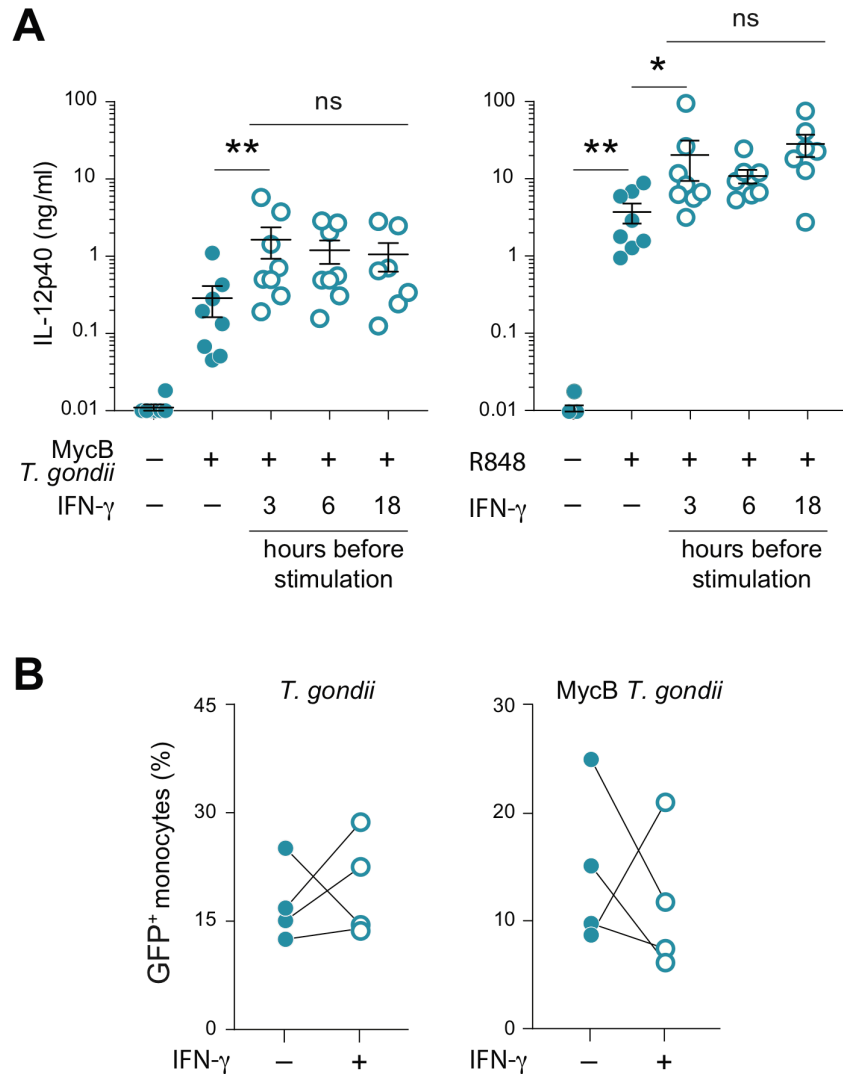

**Supplemental Figure 2: Efficient IFN- $\gamma$ -priming of CD16<sup>neg</sup> monocytes for IL-12 secretion requires at least 3 hour pre-exposure but does not affect either parasite invasion or rate of phagocytosis of MycB-treated *T. gondii* tachyzoites**

(A) MACS-purified CD16<sup>neg</sup> monocytes from 8 healthy donors were primed with IFN- $\gamma$  (10 ng/ml) for 3, 6, or 18 hours prior to stimulation with MycB-treated tachyzoites (left) or R848 (right). After 18 hours incubation culture supernatants were collected and IL-12p40 measured by ELISA. (B) Purified CD16<sup>neg</sup> monocytes from 4 healthy individuals cultured overnight in medium alone or with IFN- $\gamma$  (10 ng/ml) were exposed to untreated or MycB-treated GFP-labeled RH88 tachyzoites and the frequency of GFP<sup>+</sup> monocytes was analyzed by flow cytometry 3 hours later. Each symbol indicates one donor.

\* $P < 0.05$ , \*\* $P < 0.01$ .

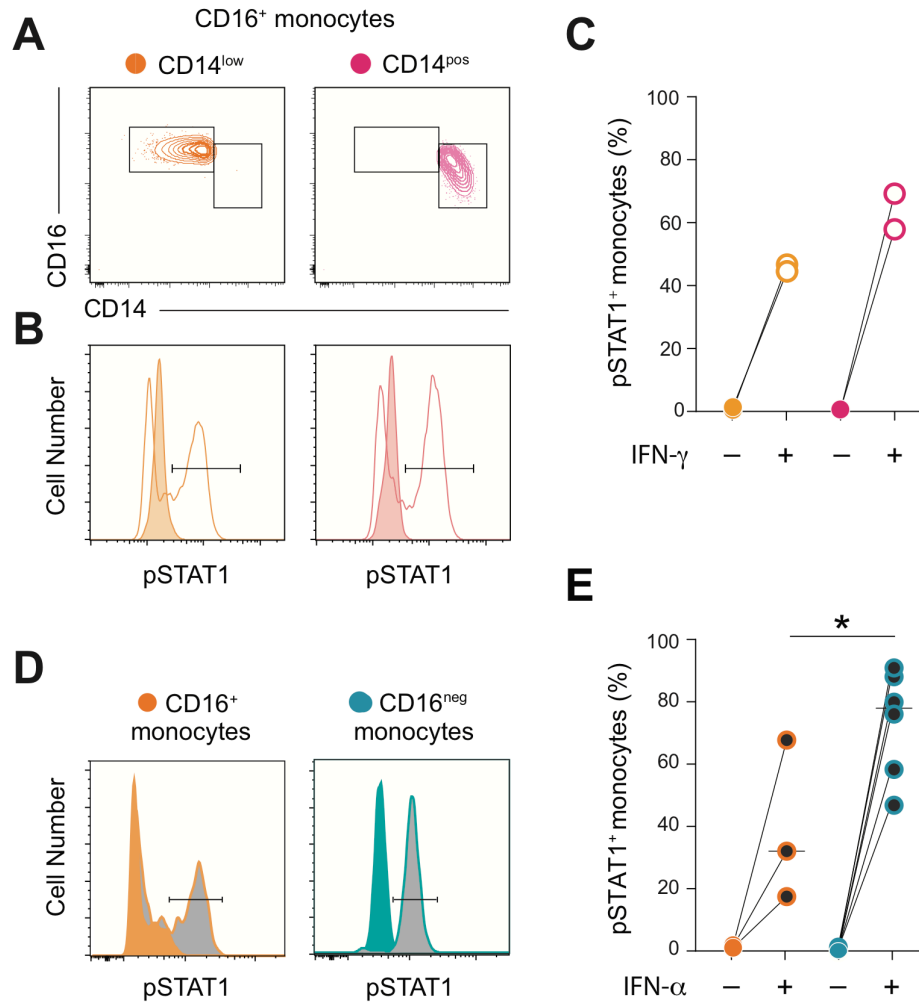

**Supplemental Figure 3: Frequency of pSTAT1<sup>+</sup> cells in CD14<sup>low</sup>CD16<sup>+</sup> and CD14<sup>+</sup>CD16<sup>+</sup> monocytes after IFN- $\gamma$  stimulation and in the CD16<sup>+</sup> and CD16<sup>neg</sup> monocyte subsets after exposure to IFN- $\alpha$**

(A) Contour plots of CD14 vs. CD16 staining pattern of FACS-sorted CD14<sup>low</sup>CD16<sup>+</sup> and CD14<sup>+</sup>CD16<sup>+</sup> monocytes. (B) Representative histograms of pSTAT1-staining after 30 min stimulation with medium (filled) or IFN- $\gamma$  (open) in indicated populations. (C) Frequency of pSTAT1<sup>+</sup> in CD14<sup>low</sup>CD16<sup>+</sup> and CD14<sup>+</sup>CD16<sup>+</sup> monocytes from two different donors. (D) Representative histogram of pSTAT1 staining for FACS-sorted CD16<sup>+</sup> and CD16<sup>neg</sup> monocytes cultured in medium (orange or blue filled) vs. IFN- $\alpha$  (10 ng/ml) (gray filled) for 30 min. (E) Graph depicts the frequency of pSTAT1<sup>+</sup> CD16<sup>+</sup> or CD16<sup>neg</sup> monocytes from individual donors (n=3-6). \**P* < 0.05.

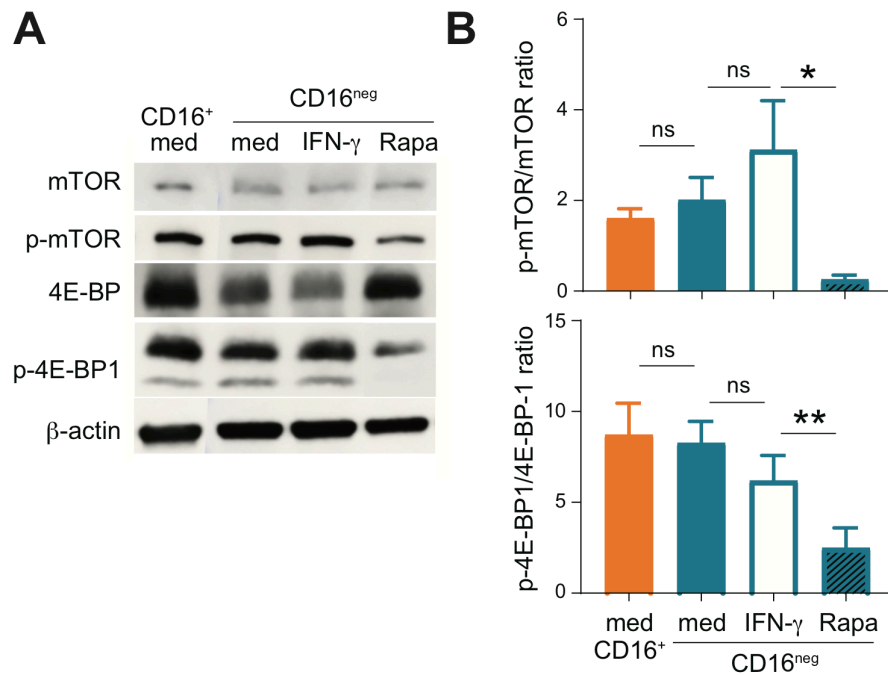

**Supplemental Figure 4: mTOR activity is comparable in unstimulated CD16<sup>+</sup>, CD16<sup>neg</sup> and IFN- $\gamma$ -primed CD16<sup>neg</sup> monocytes**

The levels of phosphorylated isoforms of mTOR or 4E-BP1 complex was assayed by Western blot analysis of cell lysates from CD16<sup>+</sup>, CD16<sup>neg</sup> and IFN- $\gamma$ - or rapamycin-pretreated CD16<sup>neg</sup> monocytes. (A) Immunoblots of one representative donor. The protein bands were quantified and normalized to  $\beta$ -actin. (B) Bars represent mean  $\pm$  SD values of the calculated ratios for mTOR (top) and 4E-BP1 complex (bottom) in indicated monocyte populations from 4 healthy donors. Statistical analyses were performed using Student *t*-test. \* $P < 0.05$ , \*\* $P < 0.01$ .
